# Supplementary material for: Workforce Attrition Among Male and Female Physicians Working in US Academic Hospitals, 2014-2019
Source: PubMed Central journal article supplement (PMC10352856; doi:10.1001/jamanetworkopen.2023.23872), 2023-07-17
Supplement: jamanetwopen-e2323872-s001.pdf [file jamanetwopen-e2323872-s001.pdf]

## Supplemental Online Content

Chen YW, Orlas C, Kim T, Chang DC, Kelleher CM. Workforce attrition among male and female physicians working in US academic hospitals, 2014-2019. *JAMA Network Open*. 2023;6(7):e2323872. doi:10.1001/jamanetworkopen.2023.23872

**eFigure.** Odds Ratios of Attrition Rates Comparing Female Versus Male Physicians Across States

This supplemental material has been provided by the authors to give readers additional information about their work.

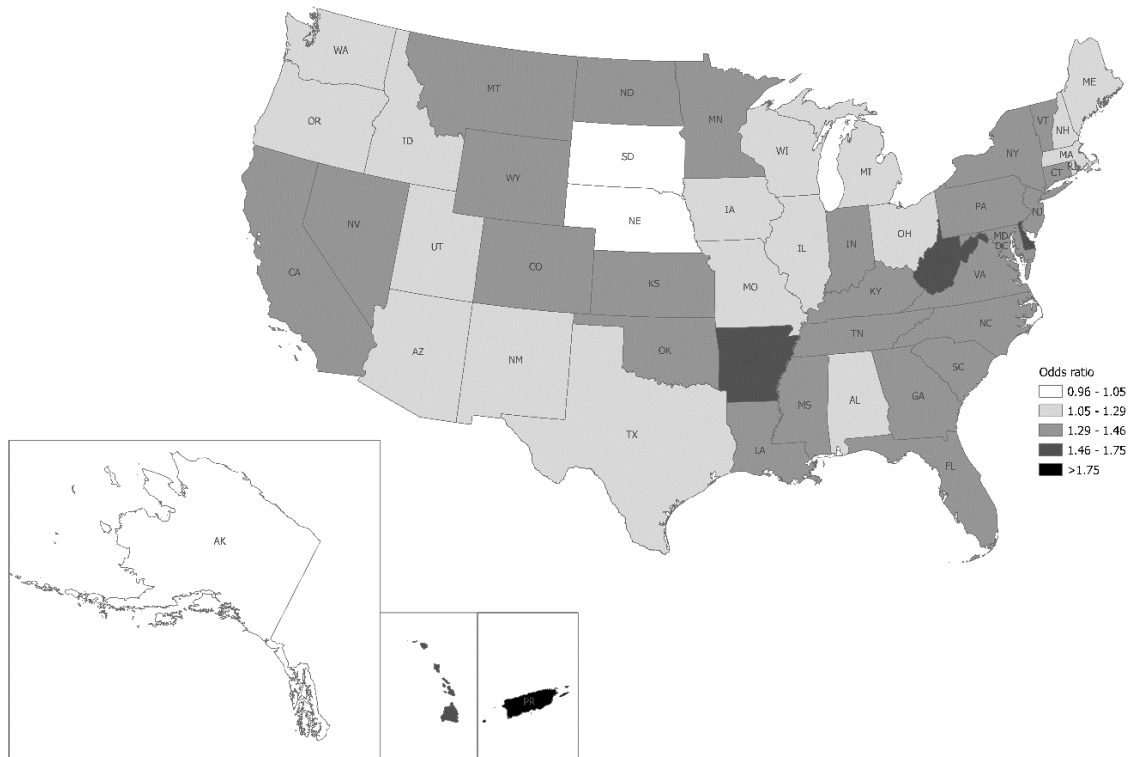

**eFigure.** Odds Ratios of Attrition Rates Comparing Female Versus Male Physicians Across States
