# Supplementary material for: Workforce Attrition Among Male and Female Physicians Working in US Academic Hospitals, 2014-2019
Source: PubMed Central journal article supplement (PMC10352856; doi:10.1001/jamanetworkopen.2023.23872), 2023-07-17
Supplement: jamanetwopen-e2323872-s002.pdf [file jamanetwopen-e2323872-s002.pdf]

## Data Sharing Statement

Chen. Workforce Attrition Among Male and Female Physicians Working in US Academic Hospitals, 2014-2019. *JAMA Netw Open*. Published July 17, 2023.  
doi:10.1001/jamanetworkopen.2023.23872

### Data

**Data available:** No
